## **Sensory experience selectively reorganizes the late component of evoked responses**

Edgar Bermudez-Contreras<sup>1</sup>, Andrea Gomez-Palacio Schjetnan<sup>2</sup>, Artur Luczak<sup>1</sup>, Majid H. Mohajerani<sup>1,\*</sup>.

<sup>1</sup>Canadian Centre for Behavioral Neuroscience, University of Lethbridge, Lethbridge, AB T1K 3M4, Canada

<sup>2</sup>Krembil Neuroscience Center, Toronto, Canada.

### **Corresponding author:**

\*Majid H. Mohajerani, email: [mohajerani@uleth.ca](mailto:mohajerani@uleth.ca), Tel: 403 394 3950

Address: Department of Neuroscience, Canadian Centre for Behavioural Neuroscience, University of Lethbridge, Lethbridge, AB, Canada, T1K 3M4

### **Keywords**

Cortical dynamics, sensory perception, spatiotemporal cortical patterns, sensory experience, learning, sensory cortices.

## **Abstract**

In response to sensory stimulation, the cortex exhibits an early transient response followed by a late and slower activation pattern. Recent studies suggest that the early component represents features of the stimulus while the late component is associated with stimulus perception. In this work we study how patterns of evoked activity are modified by experience at meso and microcircuit scales using voltage and extracellular glutamate transient recordings over widespread regions of mice dorsal neocortex or single-unit activity recordings with multi-shank silicon probes in rat cortex. We find that repeated tactile or auditory stimulation selectively modifies the spatiotemporal patterns of activity mainly of the late evoked response at the mesoscale and microcircuit levels. This modification results not only in an increase in amplitude of the late response, but also in an increased similarity between the spatiotemporal patterns of the early and late evoked activity across trials. These changes are only present in the sensory area corresponding to the modality that received the repeated stimulation and they persisted up to one hour. Thus, this selective long-lasting spatiotemporal modification of the cortical activity patterns provides new insights about how perception-related cortical activity changes with sensory experience at multiple scales.

## Introduction

The ability to learn from and adapt to changes in their environments are crucial skills that allow organisms to survive. The neural correlates of such adaptive processes correspond to changes in patterns of brain activity. The study of how these changes are encoded and transformed by the brain is crucial to understand brain computation<sup>1</sup>. One of the main approaches to study the neural coding problem – to understand what features of brain activity encode information about the stimulus – is to analyze the dynamics of evoked brain responses. Recently, this approach has been used to study sensory perception for discrimination tasks in the somatosensory and visual cortices in rodents and humans<sup>2-5</sup>. In these experiments, it was shown that the evoked responses have two components, an early and a late evoked deflections. When compared, hit trials, in which the perception of the sensory stimulus is arguably better, show a larger late evoked deflection than in trials where the animals fail to discriminate the stimulus. Moreover, when the late evoked response is inactivated, the task performance decreases<sup>2,4</sup>. Therefore, these results suggest a causal role of the amplitude of the late evoked response for the performance in sensory discrimination tasks due to sensory perception being affected when the late evoked response is perturbed. In humans, the biphasic structure of the sensory evoked response has been reported and researched extensively using functional magnetic resonance imaging (fMRI) and electroencephalography (EEG)<sup>6,7</sup> and magnetoencephalography (MEG) to study cognitive functions<sup>7-13</sup>.

In addition to sensory perception, the study of evoked responses has also advanced our understanding of learning and brain plasticity<sup>14,15</sup>. In fact, pioneer *in vitro* electrophysiological studies of changes in synaptic efficacy are one of the pillars of the current understanding of brain plasticity<sup>16,17</sup>. More recent studies have demonstrated that experience can modify the temporal structure of firing patterns in different brain regions in freely behaving rodents<sup>18,19</sup> and even in anesthetized preparations<sup>20,21</sup>. One limitation of these studies is the spatial scale at which these processes are studied. Since complex cognitive functions such as perception and learning involve the interaction of multiple brain structures, the study of experience dependent changes of spatiotemporal patterns of sensory evoked responses at multiple scales can expand our understanding of the relationship between sensory perception and brain plasticity.

Here we present a study of the dynamics of the sensory evoked responses in different modalities in anesthetized and awake rodents at different spatiotemporal scales using wide-field Voltage-sensitive dye, glutamate imaging and multi-shank silicon probe recordings. At the mesoscale level, the spatiotemporal evoked pattern during the late response becomes more similar to the pattern during the early evoked response after repetitive stimulation. This modification lasted up to one hour after repeated stimulation. Similar changes were observed in extracellular glutamate recordings in awake mice receiving auditory stimulation. At the micro-circuit level, repeated tactile stimulation changed the amplitude and the temporal

structure of the late evoked response which became more similar to the temporal structure of the early evoked response after repeated stimulation.

In summary, our results show that the changes induced by experience to the perceptual signals in primary sensory cortices might be strongly related to the late evoked responses. A detailed study of the dynamics of cortical activity at multiple scales like the one presented here can help us to understand the brain mechanisms that are involved in perception and how they are modified by experience<sup>22-24</sup>.

## Materials and Methods

### Animals

Twenty-seven C57Bl/6j adult (20-30 g, age 2-4month) mice were used for voltage-sensitive dye (VSD) experiments under anesthesia. For awake wide-field imaging experiments, 3 adult (>2 months) iGluSnFR transgenic mice (strain Emx-CaMKII-Ai85), expressing iGluSnFR in glutamatergic neocortical neurons<sup>25,26</sup>, were used. For this, Emx-CaMKII-Ai85 transgenic mice were generated by crossing the homozygous B6.129S2-Emx1tm1(cre)Krl/J strain (Jax no. 005628) and the B6.Cg-Tg(CamK2a-tTA)1Mmay/DboJ strain (Jax no.007004) with the hemizygous B6;129S-Igs7 tm85(teto-gltI/GDP\*) Hze/J strain (Jax no.026260). This crossing is expected to produce expression of iGluSnFR within all excitatory neurons across all layers of the cortex, but not in GABAergic neurons<sup>27,28</sup>. Brain sections of the positive transgenic mice confirmed robust expression in the neocortex and hippocampus. All the electrophysiological recordings were performed on adult Long-Evans rats (400-900 g, n = 10)<sup>20</sup>. All procedures were performed following approved protocols by the University of Lethbridge Animal Care Committee (ACC) and in accordance with the standards of the Canadian Council on Animal Care (CCAC).

### Surgery

Mice were anesthetized with 15% urethane in HEPES-buffered saline solution (1000-1250 mg/kg depending on the age and weight) and fixed in a stereotactic apparatus. Body temperature was maintained at 37°C with an electric heating pad regulated by a feedback thermistor throughout surgery and imaging. Mice were given Dexamethasone (80 µg) intramuscularly to prevent inflammation and Lidocaine (50 µl, at 0.2%) into the skin over the craniotomy area for local anesthesia. For Voltage-sensitive dye imaging experiments, a 7 × 6 mm unilateral craniotomy (bregma 2.5 to -4.5 mm, lateral 0 to 6 mm) was made and the dura mater was removed, as described previously<sup>29-31</sup>. In all cases for VSD imaging, mice were also given a tracheotomy to assist with breathing. For each hour under anesthesia, the mouse was given an intraperitoneal injection of 10 ml/kg of 0.5% dextrose and 0.9% saline solution to maintain hydration. For recordings in awake mice, a craniotomy of ~ 4mm of diameter was performed to expose the auditory cortex. This cranial window had the squamosal bone to its the lateral end and its caudal end was 0.5mm

anterior to the lambdoid structure. Finally, a stainless steel head-plate was fixed to the skull using metabond and dental cement, a glass coverslip was placed on top to keep the surface clear from accumulating debris from the environment (Fig. S4). After two weeks of recovery from this procedure, these animals started to be habituated to the recording apparatus (see wide-field imaging procedure below). For silicon probe electrophysiological recording experiments, rats were anesthetized with urethane (initial intraperitoneal injection of 3 mL of 20% urethane in PBS, supplemented with 0.2-mL injections as needed; final dose 1.2–1.4 g/kg) and placed in a stereotaxic frame and a window in the skull over the hind limb area (HL) of the primary somatosensory cortex (S1) (1mm anteroposterior; 2mm mediolateral from bregma and 1.5 mm dorsoventral) as described previously<sup>32</sup>.

### **Wide-field optical imaging**

For VSDI experiments, the dye RH-1691 (optical Imaging, New York, NY) was diluted in HEPES-buffered saline solution (0.5mg/1ml), applied to the brain for 45 min and rinsed subsequently, which stained all neocortical layers as reported previously<sup>29</sup>. The brain was then covered with agarose in HEPES-buffered saline at 0.6% concentration and sealed with a glass coverslip. This procedure reduced the movement artifacts produced by respiration and heartbeat. VSD imaging began ~30 min after washing unbound VSD. For VSD data collection, 12-bit images were captured at 150 Hz during evoked activity and at 100 Hz during spontaneous activity with a charge-coupled device (CCD) camera (1M60 Pantera, Dalsa, Waterloo, ON) and an EPIX E8 frame grabber with XCAP 3.8 imaging software (EPIX, Inc., Buffalo Grove, IL). The dye was excited using a red LED (Luxeon K2, 627 nm center) and excitation filters of  $630 \pm 15$  nm. Images were taken through a macroscope composed of front-to-front video lenses (8.6 x 8.6 mm field of view, 67  $\mu$ m per pixel). Reflected VSD fluorescence was filtered using a 673-to-703 nm bandpass optical filter (Semrock, New York, NY). To reduce potential VSD signal distortion caused by the presence of large cortical blood vessels, the focal plane was set to a depth of ~1mm from the cortex surface. To monitor extracellular glutamate concentration in iGluSnFR mice, the same camera and lenses were used as for VSD recordings. However, a blue LED (Luxeon K2, 473 nm) and an excitation filter (Chroma, 467-499 nm) were used to excite the glutamate fluorescent indicators. The reflected fluorescent signal from excited indicators was filtered using a (Chroma, 510 to 550 nm) band-pass optical filter (Semrock, New York, NY). To reduce potential artifacts caused by the presence of large cortical blood vessels, the focal plane was set to a depth of ~1 mm from the cortical surface. For awake glutamate recordings, mice were habituated to the recording setup after two weeks of recovery from the head-plate implant. This consisted of putting the animals one by one on the recording platform with one or two pieces of Cheerios cereal. After a few days of becoming familiar with the apparatus, the animals were head-restrained in incremental daily periods

starting from 20 min, and increasing 5 minutes per day, reaching a total restriction time of 1.5 hours. During the head-fixation period, each animal was placed inside a plastic tube to limit motion and encourage relaxation. In addition, the temperature of the platform was increased to room temperature using microwavable heat pads.

### **Electrophysiology**

After the animals were anesthetized with urethane (see Surgery procedure above) and placed in the stereotaxic frame, silicon probes were inserted into the hind limb area of the somatosensory cortex. The silicon probes had eight shanks (200 mm shank separation): each shank had four recording sites in a tetrode configuration (20 mm separation between sites; 160 mm<sup>2</sup> site area; 1–3 MOhm impedance; NeuroNexus Technologies). The locations of the recording sites were determined to be layer V in S1 based on histological reconstruction of the electrode tracks (see <sup>20</sup>), electrode depth, and firing patterns (see <sup>32</sup> for a detailed description of this procedure).

### **Sensory Stimulation**

The experiment consisted of three different periods in time. The first period consisted of 20 single-pulse stimulation trials of 5 seconds each. Each trial consisted of a 0.9 s baseline period followed by a single pulse electrical current to the hind paw, followed by 4.1 s after stimulus onset. Single-pulse stimulation was given to three different sensory modalities in different experiments to evaluate changes in the evoked responses induced by repeated stimulation. To induce evoked responses in the somatosensory cortex (S1), a thin acupuncture needle was inserted into the paw and a 0.2-0.3 mA, 1ms electrical pulse was delivered. A 1ms pulse of green light was delivered as visual stimulation and a 12 kHz 60-80dB 50ms tone was played to evoke auditory responses. The second period consisted of repeated continuous stimulation for 30 min. During this auditory stimulation, a continuous 20 Hz frequency stimulation pulses (0.2-0.3 mA, 1ms) were given to the hind paw. For repeated auditory stimulation, a series of 12 kHz 1 sec tone followed by 1 sec of silence were given for 30 min. Finally, the third period consisted of a set of 20 single-pulse stimulation trials of 5 seconds each. Each trial was the same as in the first period (Fig. 1). Before the experiment started, Methamphetamine (1mg/kg, Sigma-Aldrich) was injected to induce a desynchronized brain state. To ensure that the brain reached a desynchronized brain state, data collection started 10-15 min after injection for the drug effect to stabilize and we visually verified that the cortical LFP showed increased content in high frequency and reduced amplitude. It is known that desynchronized brain states enhance changes induced by repeated stimulation during urethane anesthesia <sup>20</sup>.

After the neural activity became stable (~30 min), the rats were injected with amphetamine (1 mg/kg). Each recording period consisted of 10 min of spontaneous activity, followed by 20 min of tactile stimulation, and then another 10 min of spontaneous activity. The tactile stimulation consisted of 600 repetitions of 1 s

stimulation at 20 Hz followed by 1 s without stimulation (Fig. 4). The tactile stimulator consisted of a plastic rod attached at one end to a membrane of a speaker controlled by a computer. The other end of the rod was placed in contact with left hind paw of the animal.

### **Data analysis of imaging data**

To correct for time-dependent changes in VSD signals due to bleaching, 20 non-stimulation interleaved trials were used for normalization of the evoked data. A 10-s interval between each sensory stimulation was used. Although VSD fluorescence has been shown to have relatively high labeling at a depth of  $\sim 750$   $\mu\text{m}$  across the cortex<sup>29</sup>, all VSD recordings were expressed as a percentage change relative to baseline VSD responses ( $\Delta F/F_0 \times 100\%$ ) to reduce regional bias in VSD signal caused by uneven dye loading or brain curvature. Analogously, for glutamate imaging changes in glutamate concentration were also defined as a relative quantity to a baseline ( $\Delta F/F_0 \times 100\%$ ). VSD imaging of spontaneous activity was continuously recorded in the absence of sensory stimulation at 100 frames per second. Slow, time-dependent reductions in VSD fluorescence were corrected in MATLAB® using a zero-phase lag Chebyshev bandpass filter (zero-phase filter) at 0.1 to 6 Hz. Ambient light resulting from VSD excitation (630 nm) was measured at  $8.65 \times 10^{-3}$  W/m<sup>2</sup>. In addition, for glutamate awake recordings, raw data were corrected using global signal regression to remove global hemodynamic and illumination fluctuations (Xie et al., 2016).

To measure the similarity between the early and late evoked responses, each stimulation trial was compared against a template constructed from the average evoked response during the first 33.3 ms after stimulus onset. The template consisting of the average of the first 5 frames (33.33 ms) after the evoked response was larger than one standard-deviation of the baseline. Similar results were obtained when using different templates lengths (data not shown). The similarity between the template and the evoked activity was calculated as the correlation coefficient between the template and each frame in the stimulation trial (Fig. 1b and 1d). To measure the similarity of the spontaneous activity to the early evoked response the template matching procedure described above was used. The similarity between the spontaneous activity and the template was calculated using a sliding window with 6.66ms overlap during 1.5 sec of the inter-stimulus interval after 2.5 sec of the stimulus onset of each trial (Fig. 1g).

### **Analysis of the electrophysiological recordings.**

For the electrophysiological recordings in anesthetized rats the 600 trials of repeated tactile stimulation were divided into 3 groups. The first 200 trials were labeled as 'before', and the last 200 trials were labeled as 'after'. The reason behind this nomenclature was to compare the single-unit activity at the beginning and at the end of the stimulation period. The early evoked response was defined as the first 120 ms after stimulus onset and the late evoked response was defined as the activity between 180 and 505 ms after stimulus onset. To isolate single-unit activity spike sorting was performed semi-automatically using Klustakwik<sup>33</sup> followed

by manual clustering using MClust<sup>34</sup>. Only putative pyramidal neurons were considered for analysis. This type of neuron was selected by discarding fast-spiking cells based on their autocorrelograms.

*Neuronal participation in evoked responses.* A neuron was defined to participate in the early (or late) component of the evoked response if its smoothed spike train (Gaussian smoothed, sigma = 4 bins) was above at least two standard deviations from the baseline during the early (or late) period. The baseline was defined as the mean of the smoothed spike trains 350 ms before stimulus onset. The neurons that participate are assigned a 1 or 0 if they participate in the corresponding component of the evoked response for each stimulation trial (Fig. 4d-e).

*Temporal organization of the evoked responses.* The temporal structure of the early and late evoked responses was calculated using the latency of each neuron measured as the center of mass of the cross-correlogram between the firing pattern of that neuron and the multi-unit activity of the rest (defined in<sup>20</sup>). This measure captures the temporal order of the firing of each neuron in comparison with the rest of the population (Fig. 4f-h).

*Early and late component organization of the evoked responses.* To evaluate whether the evoked response was formed by either one or two components, a ratio of the goodness of fit of a non-linear mixture of Gaussian models was used. This ratio was defined as the difference between the fit using two Gaussians and one Gaussian divided by the sum of the fit using two Gaussians and one Gaussian (Fig. S1).

## **Statistical tests.**

All statistical tests for the comparison between two groups (before and after repeated stimulation) were performed using MATLAB built-in functions. One-sided paired t-test and Wilcoxon signed-rank tests were used to assess the similarity between the early and late evoked responses, for both imaging and single-unit activity recordings. When more than two groups were compared, ANOVA with ad-hoc Bonferroni correction was used.

## **Results**

### **Early and late evoked response at the mesoscale level**

Brain activity was monitored using VSD wide-field imaging over much of the dorsal cortex of the right hemisphere in anesthetized mice injected with amphetamine (Fig. 1a, see Methods). To evaluate the changes induced by experience, the evoked responses to single pulses of stimulation were recorded before and after repeated intermittent stimulation (Fig.1b). As reported before<sup>2-4,31</sup>, we found that the sensory evoked response to a single pulse stimulation consists of two components, an early and a late evoked



responses. This organization is observed across different modalities (Fig. S3). The early evoked response lasts roughly 100 ms and appears approximately after 25 ms after stimulus onset. Usually, this early evoked response is attributed to thalamo-cortical connections<sup>3</sup>. The late component of the evoked response consists of a larger period of time that lasts around 200-250 ms and appears 200-300 ms after stimulus onset approximately (see shaded areas in Figs 1c-d).

After 30 min of repeated stimulation of the hind paw, a reorganization of the evoked response to single pulse stimulation was observed. The late evoked response increases in amplitude after repeated stimulation and the early component tends to decrease (Fig. 1d). In addition, after repeated stimulation, the late evoked pattern of activity resembles the early evoked response more closely than before (Fig. 1c). To quantify this spatiotemporal reorganization of the late evoked response, we calculated the similarity between the early and late evoked responses for each stimulation trial using template matching. The similarity was calculated as the correlation coefficient between a template from the average response during the first 100ms and each stimulation trial (Fig. 1e i-ii). After repeated stimulation of the hind paw, the similarity between the early and late components increases.

To evaluate how long these changes last for, the evoked responses to single pulse stimulation of the hind paw were recorded up to 90 min after repeated stimulation (Fig. 1e and Fig. S1a). The similarity between the early and late evoked responses last for up to one hour after repeated stimulation compared to their similarity before (baseline) repeated stimulation (one-way ANOVA with Bonferroni correction, the stars represent  $p < 0.05$ ). Moreover, the early component of the evoked pattern of activity reverberates during the subsequent periods of spontaneous activity up to 15-30 min after the repeated stimulation stopped (Fig. 1g). This resembles the same timescale of reverberation reported in temporal patterns of single-unit activity in anesthetized rats<sup>20</sup>. The increase in amplitude of the late evoked response and its similarity to the early evoked response is observed even 1hr after repeated stimulation. These changes are not observed in animals that did not receive repeated stimulation (Fig. S1b-d).

Finally, we confirmed that similar results occur in awake head-fixed transgenic iGluSnFR mice<sup>26</sup>. In this experiment, auditory repeated stimulation was given to mice while recording the extracellular glutamate concentration over the auditory cortex (Fig. 1h (i)). The similarity between the early and late components of the spatiotemporal evoked response increase after repeated auditory stimulation (Fig. 1h (ii), paired t-test,  $p < 0.05$ ).

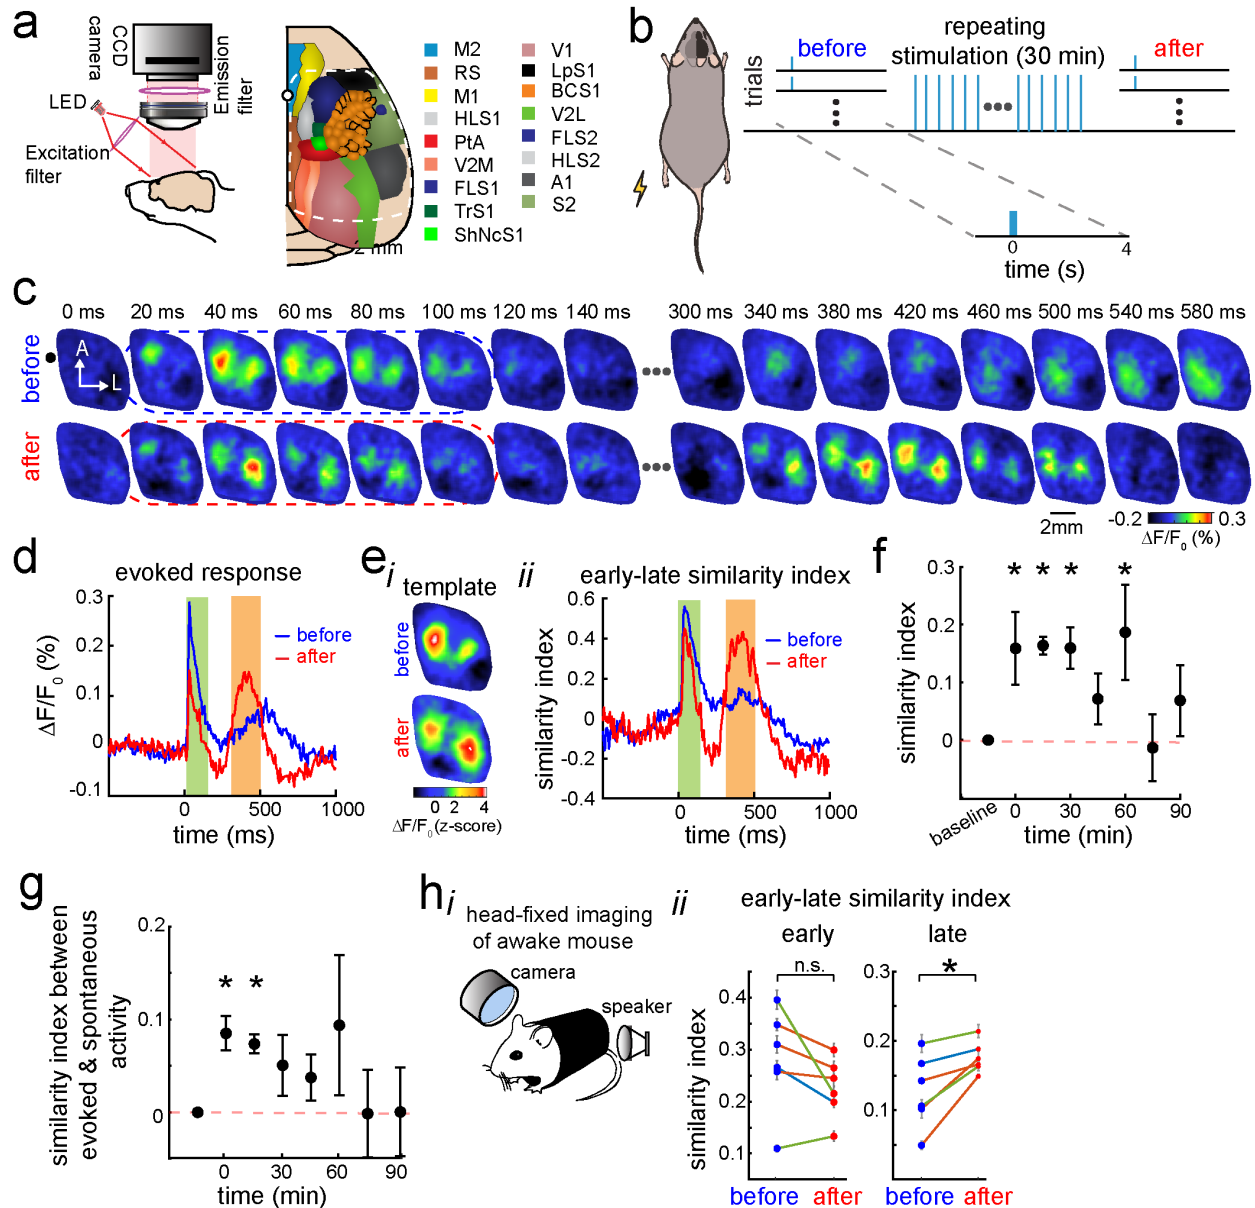

**Fig. 1. Spatiotemporal changes in the early and late evoked responses induced by repeated stimulation.** (a) Schematic of the VSD imaging apparatus (left). A CCD camera records changes in voltage over the imaged area. The voltage-sensitive dye is excited by a red LED, the reflected light is then filtered and finally captured by the camera. A craniotomy is performed over the right hemisphere to expose the cortical areas imaged (right). The red dashed line denotes a typical cranial window. (b) Experimental protocol. The anesthetized mouse injected with amphetamine received 20 trials of single-pulse electrical stimulation to the hind paw followed by 30 min of rapid (repeated) stimulation of the hind paw at 20 Hz and finally received 20 trials of single-pulse stimulus to the hind paw. (c) Example of hind paw evoked activity before (top) and after (bottom) repeated stimulation of the hind paw. (d) Average evoked response for hind paw stimulation (left). The green and yellow areas represent the early and late evoked responses, respectively. (e) Similarity to the early evoked response. (i) Templates of early evoked activity before and after repeated stimulation. (ii) Similarity between the templates and the evoked response before (blue) and after (red) repeated stimulation. (f) Dynamics of changes induced by the repeated stimulation. Similarity between the early and late components of evoked responses measured every 15 min for 1.5 hr. (g). Reverberation of evoked patterns of activity during spontaneous activity measured up to 1.5 hours after repeated stimulation (right).  $n=3$ , error bars represent S.E.M. and stars represent statistically different to baseline trials (one-way ANOVA with Bonferroni

correction). **(h)** Recordings in head-fixed awake mice **(i)**. Similarity between template and early evoked responses (left) and late evoked responses (right) in awake animals before (blue) and after (red) repeated stimulation **(ii)**. ( $n = 3$  animals, each with two sessions of 30 trials of stimulation each. Error bars denote S.E.M. and stars denote  $p < 0.05$ , paired t-test).

### **Stimulation dependent changes in the amplitude of the early and late evoked responses**

In order to evaluate whether the changes induced by stimulation occur only in the sensory modality that received the repeated stimulation, electrical pulses to the hind paw of the animal were interleaved with visual stimulation (see Methods), and repeated electrical pulses of stimulation (Fig. 2a) were only given to the hind paw (not repeated visual stimulation).

After repeated electrical stimulation of the hind paw, there is an increase in the evoked response, mainly during the late component of the hind paw evoked response (Fig. 2c **(i)**) which is not observed in the visual evoked response (Fig. 2c **(ii)**). Interestingly, the opposite effect is observed in the visual evoked response. Moreover, quantification of the amplitude of the average evoked response shows that there is a significant increase (pair-wise t-test,  $p < 0.05$ ,  $n=11$ ) in the amplitude of the late hind paw evoked response after repeated stimulation (Fig. 2d **(i)**) but no significant changes in the visual evoked response (Fig. 2d **(ii)**).

### **Spatiotemporal reorganization of the late evoked response after repeated stimulation**

To evaluate whether the reorganization of the spatiotemporal late evoked response after repeated stimulation was exclusive to the sensory modality that was stimulated, the similarity between the late evoked response and the pattern of activity during the early response were compared for every trial of hind paw and visual stimulation.

The similarity between the early and late evoked responses was calculated using template matching as explained previously. After hind paw repeated stimulation, an increase in the mean similarity across trials between the early and late hind paw evoked responses was observed (Fig 2e **i**) but not in the visually-evoked responses in the visual cortex (Fig 2e **ii**). In fact, there is a significant increase in the similarity between the early and late evoked responses after repeated stimulation for the hind limb area of the somatosensory cortex but not for the visual evoked responses (Fig. 2f, paired t-test,  $p < 0.05$ ,  $n=11$ ).

In summary, these results suggest that the spatiotemporal reorganization of the evoked responses after repeated sensory stimulation only occur in the cortical region corresponding to the sensory modality that was repeatedly stimulated.

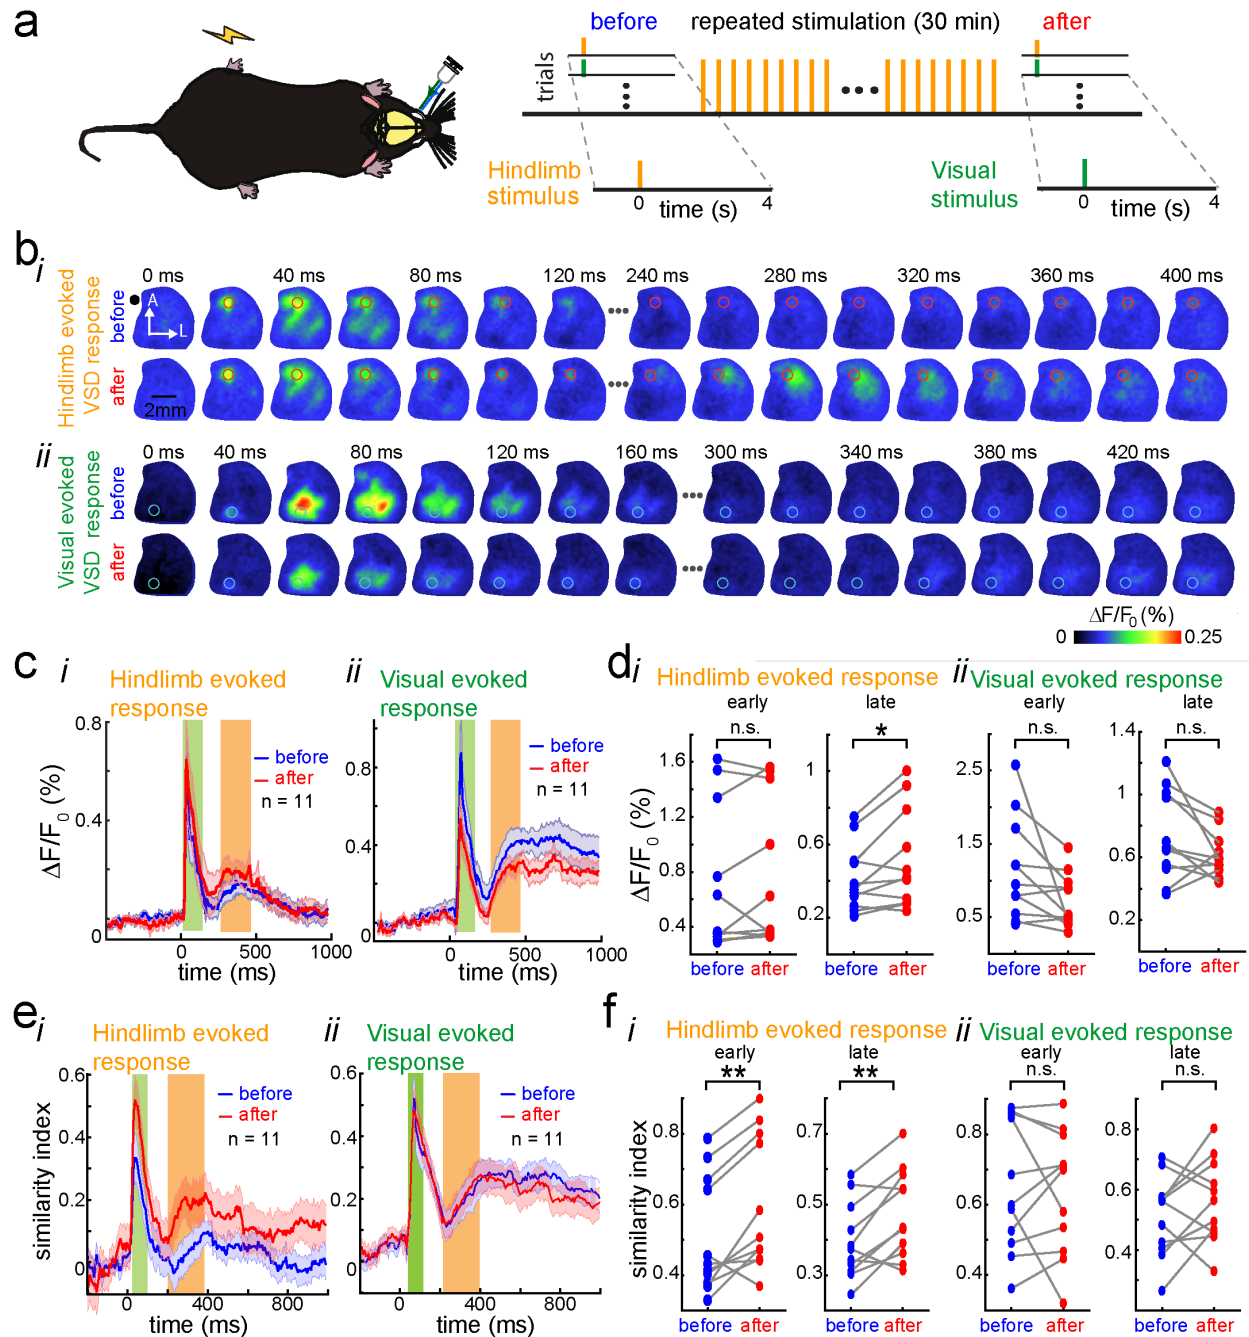

**Fig. 2. Spatiotemporal changes in the early and late evoked responses are stimulation dependent.** (a) Experimental protocol. The anesthetized mice injected with amphetamine received interleaved single-pulse electrical stimulation to the hind paw and a LED flash as visual stimulation (20 trials each) followed by 20 min of repeated stimulation of the hind paw at 20 Hz and finally received another interleaved single-pulse hind paw and visual stimulation (20 trials each). (b) Example of evoked activity dynamics in response to electrical hind paw stimulation (i) before (top row) and after (bottom row) repeated hind paw stimulation. Example of evoked activity in response to visual stimulation (ii) before (top) and after (bottom) hind paw repeated stimulation. The red and blue circles denote the region of interest (ROI) of the corresponding sensory modality. (c) Average evoked activity across animals before (blue) and after (red) HL repeated stimulation in response to HL electrical stimulation (i) and to visual stimulation (ii). The shaded regions denote the S.E.M. (n=11). Green and orange shaded regions denote the early and late components of the evoked responses, respectively. (d) Paired comparison of the peak amplitude of the early and late evoked responses. (e) Paired comparison of the similarity index of the early and late evoked responses.

evoked response before and after repeated stimulation for hind paw stimulation (i) and visual stimulation (ii). (e) Average similarity between evoked response before (blue) and after (red) repeated hind paw (i) and visual stimulation (ii) across animals. (f) Paired comparison of the similarity between the early and late evoked responses to hind paw (i) and visual stimulation (ii) before (blue) and after (red) during early (left) and late components (right). Stars represent significant increase in amplitude of the late evoked response after repeated hind paw stimulation (t-test,  $p < 0.05$ ).

### **Spatiotemporal reorganization of the late evoked response in two sensory modalities**

To evaluate whether the changes induced by the repeated stimulation were restricted to the somatosensory cortex or could be observed in other sensory cortices, auditory and hind paw repeated stimulation were provided in the same preparation (Fig 3a-b). As before, the single-pulse evoked responses were compared before and after repeated sensory stimulation. This time, a 50 ms 12 Khz tone was interleaved with 1 ms 300  $\mu$ A pulse to the hind paw, separated by 10 seconds. These single pulse stimulations (20 trials each) were repeated three times: one before any repeated stimulation (denoted evoked1), one after repeated auditory stimulation (denoted evoked2) and one more after repeated hind paw stimulation (denoted evoked3) (Fig 3b). The spatiotemporal patterns of activity show that after single tone stimulation, the early response activity starts in the auditory cortex after 20 ms from stimulus onset and expands for approximately 120 ms. Similarly, the late auditory evoked response starts around 200 ms after the stimulus onset and lasts for 300 ms approximately (Fig. 3c (i)). Analogously, the hind paw early evoked response starts after approximately 20 ms after stimulus onset in the primary somatosensory cortex and lasts for 100 ms including the secondary somatosensory cortex and expanding to the midline areas (Fig. 3c (ii)).

We found that after repeated auditory stimulation the amplitude of the early auditory evoked responses does not change compared to baseline (Fig. 3d (i) and 3e (i), left). However, the amplitude of the late auditory evoked responses increased after repeated auditory stimulation (Fig. 3d (i), and 3e (i), right). In contrast, the amplitude of the late hind paw evoked responses did not increase after the auditory repeated stimulation (Fig 3d and 3e (ii) right). After repeated hind paw stimulation (evoked3), the amplitude of the auditory evoked response (red trace) decreased (Fig. 3d, left) and in contrast, the hind paw evoked response increased (Fig 3e, right), but it was not statistically significant (Fig 3e (ii), left).

To evaluate whether the similarity between the early and late spatiotemporal responses was modified after repeated sensory stimulation, the evoked responses were compared against a template built from the first 50 ms after the onset of the evoked response. As was done previously, we calculated the correlation coefficient between the spatiotemporal auditory evoked response for every trial and the template of the early auditory evoked response before (evoked1, black trace) and after auditory repeated stimulation (evoked2, blue trace). Analogously, we compared the similarity between the early and late hind paw evoked responses before and after repeated hind paw stimulation (evoked3, red trace) (Fig. 3f-g).



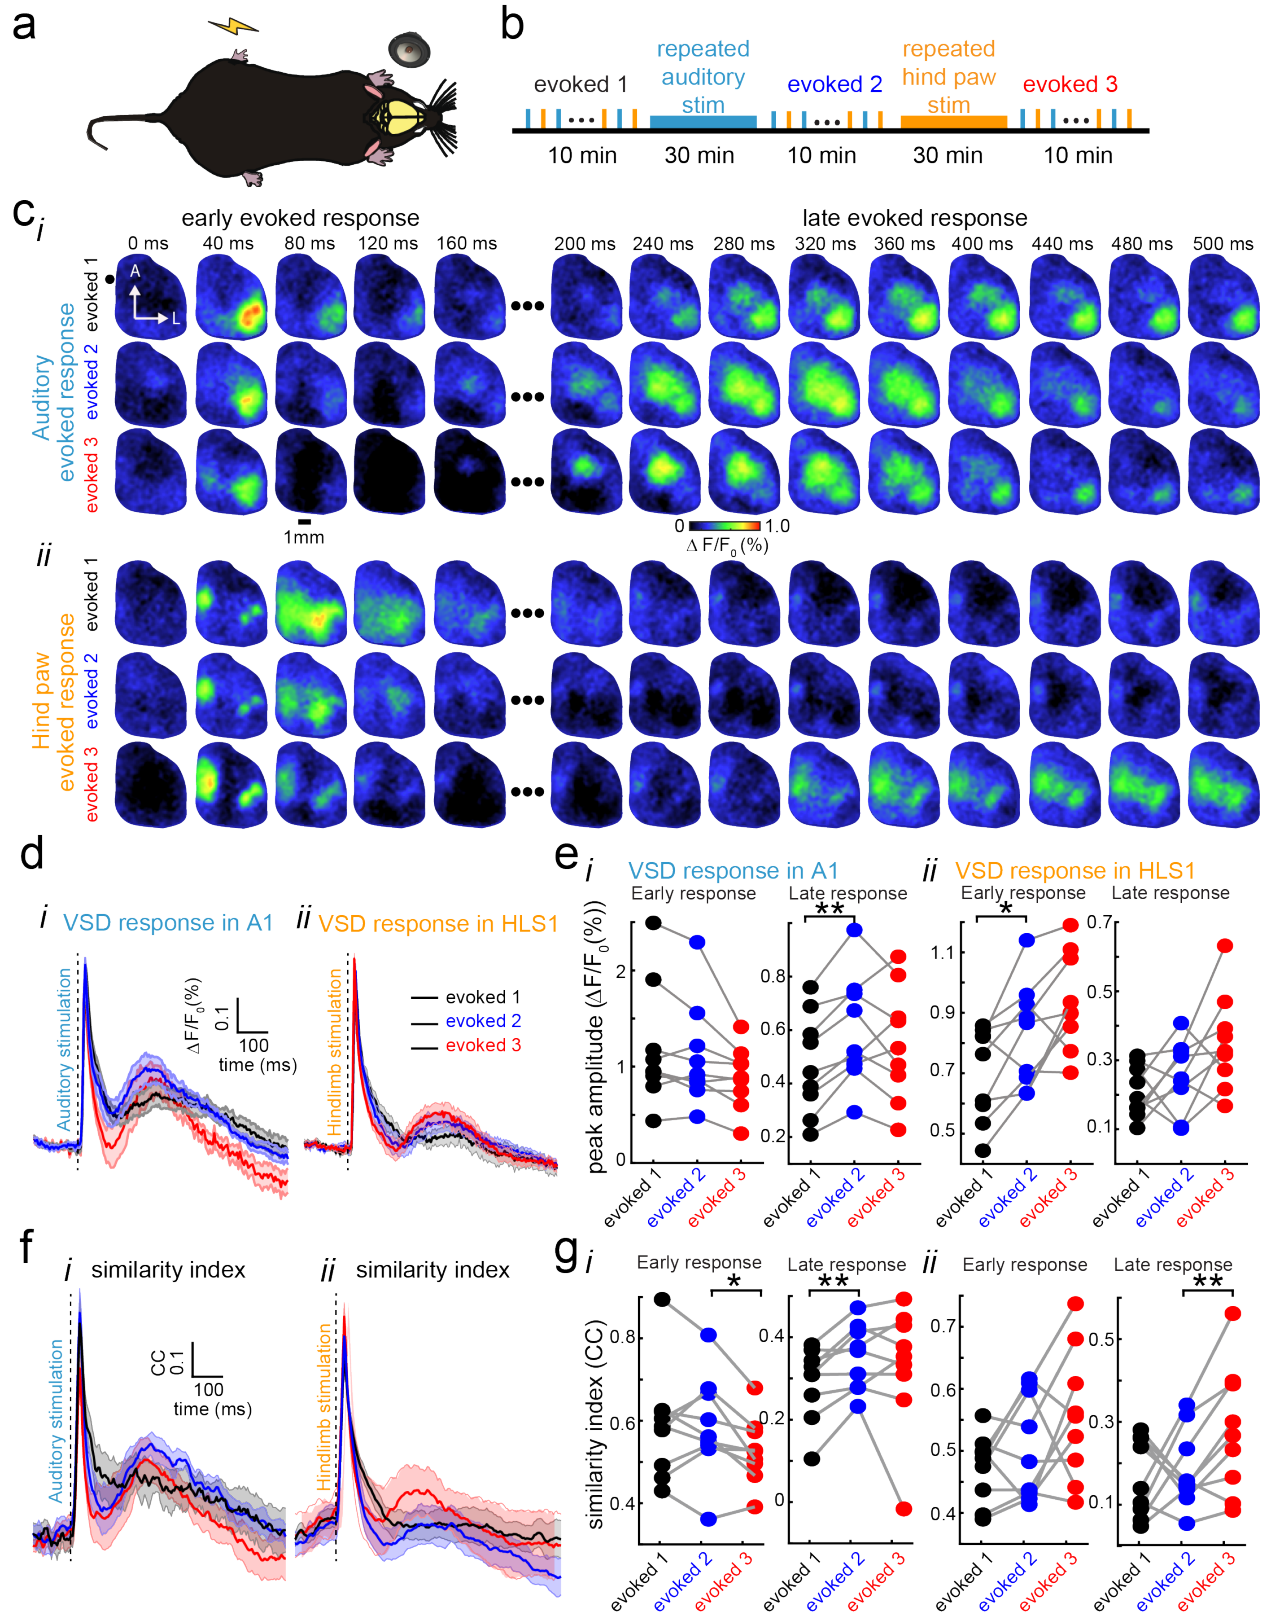

**Fig. 3. Spatiotemporal changes in the early and late evoked responses are exclusive to the stimulated sensory modality. (a)** Schematic of the experimental protocol. The anesthetized mice injected with amphetamine received

both repeated auditory and repeated hind paw stimulation. **(b)** Auditory and hind paw repeated stimulation in the same preparation. Single-pulse evoked responses to auditory and hind paw stimulation were interleaved every 10 sec before any repeated stimulation (evoked1), after auditory repeated stimulation (evoked2) and after hind paw repeated stimulation (evoked3). **(c)** Patterns of evoked responses to auditory stimulation (i) and hind paw stimulation (ii) before (evoked1) and after (evoked2) repeated auditory stimulation and after repeated hind paw stimulation (evoked3). **(d)** Average evoked response in the auditory cortex (i) and in the hind limb area of the somatosensory cortex (ii) across animals. **(e)** Pair-wise comparison between the peak amplitude of the responses to auditory stimulation (i) and hind paw stimulation (ii) during the early (left) and late (right) components. **(f)** Mean similarity between the early and late patterns of auditory evoked activity (i) and hind paw evoked activity (ii) before any repeated stimulation (black), after repeated auditory stimulation (blue) and after repeated hind paw stimulation (red) across animals. **(g)** Paired comparison between the similarity between the early and late auditory (i) and hind paw (ii) evoked responses during the early (left) and late hind paw evoked responses (right) before any repeated stimulation (black), after auditory repeated stimulation (blue) and after repeated hind paw stimulation (red). (n=9, each dot denotes an animal. \* and \*\* denote  $p < 0.05$  and  $p < 0.01$ , paired t-test respectively).

This time a significant increase in the similarity between the auditory late and early components of the evoked response was observed after repeated auditory stimulation but not after repeated hind paw stimulation (Fig. 3g (i), right). Analogously, a significant increase in the similarity between the late and early components of the hind paw evoked response was observed after repeated hind paw stimulation (Fig. 3g (ii), right) but in the auditory evoked responses. In summary, these results show that repeated sensory stimulation causes a reorganization of the evoked responses. This reorganization consists of an increase in the similarity between the spatiotemporal late evoked response and the early evoked pattern of activity. Moreover, this reorganization of the cortical activity occurs in more than one sensory modality at the mesoscale level.

### **Experience dependent changes at the micro-circuit level**

To evaluate whether the changes observed in the evoked responses at the mesoscale level occur at the microscale level, we reanalyzed our single-cell activity recordings using silicon probes in anesthetized rats. The urethane anesthetized rats were injected with amphetamine to induce a desynchronized state and received mechanical tactile stimulation to the hind paw for 20 min<sup>20</sup> (see Methods and Fig. 4a). During this period, the paw received 600 trials of stimulation (Fig. 4a-b).

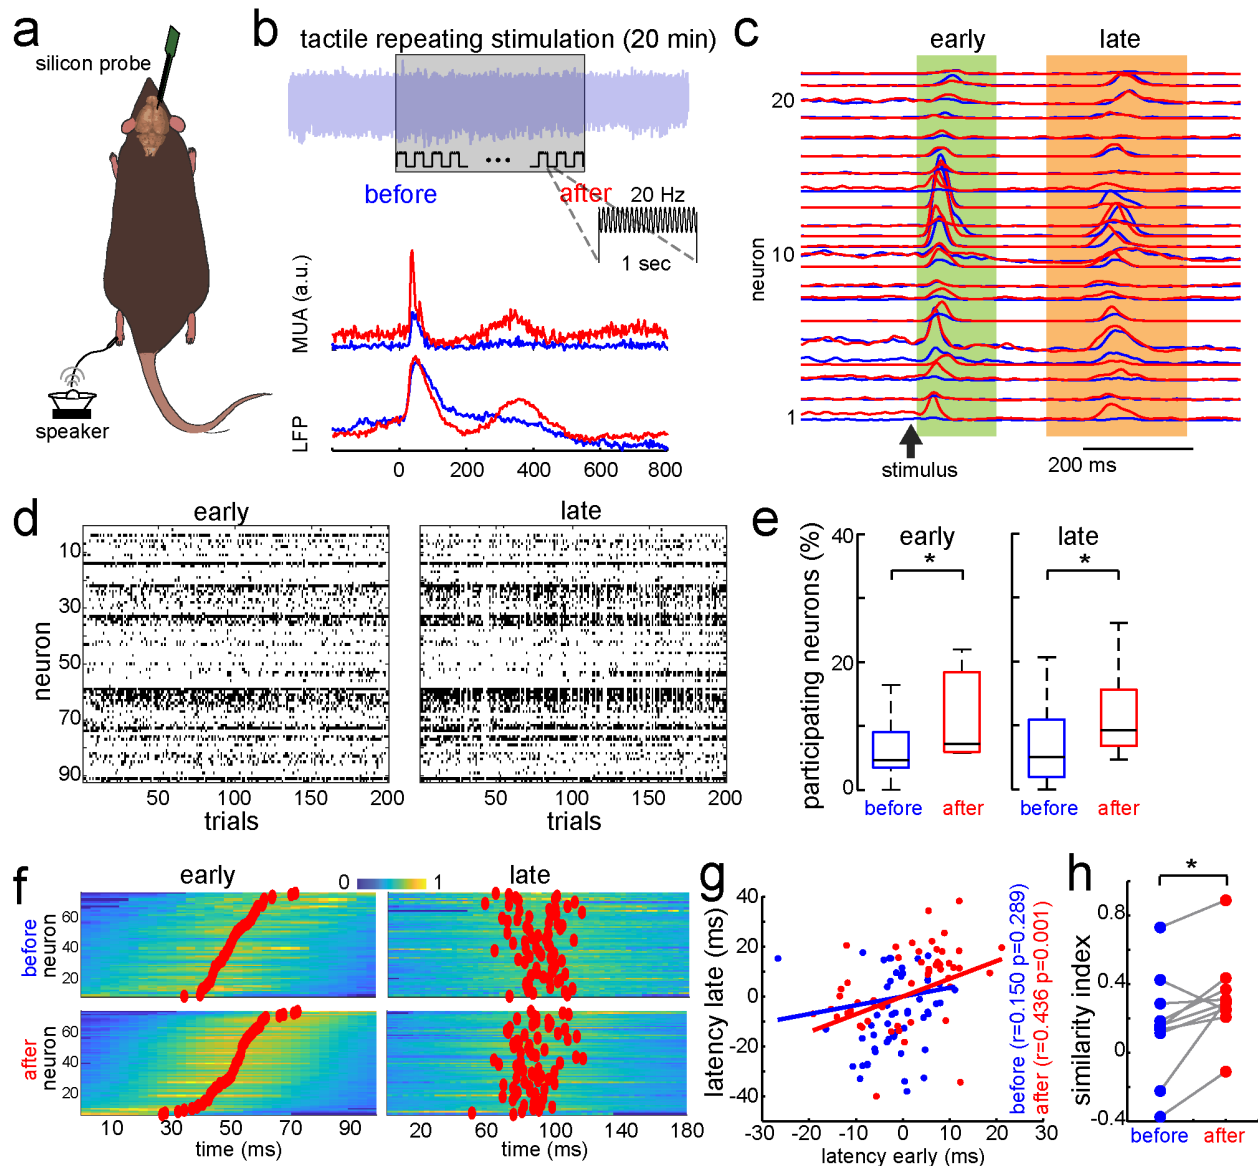

**Fig. 4. Changes induced by repeated stimulation at the microcircuit.** (a) Schematic of the experimental setup. An eight-shank silicon probe was inserted into the hind limb area of the somatosensory cortex of urethane-anesthetized rats injected with amphetamine. Tactile stimulation was given to the hind paw. (b) Experimental protocol. A series of interleaved 1 sec of tactile stimulation at 20 Hz with 1 sec of no stimulation was given to the hind paw during 20 min. The first 200 trials during this period were labelled as before (blue) and the last 200 trials of stimulation were labelled as after (red). (c) Example of firing patterns for several neurons before (blue) and after (red) repeated hind paw stimulation. Shaded regions represent the early (green) and late (orange) response components. The black arrow represents the time at which the stimulus was presented. (d) Raster plot of the participation for all neurons recorded in a rat during the early (left) and late (right) response components. A black dot represents that the neuron participated in the early (or late) evoked response for the corresponding stimulation trial. (e) Boxplot of the average percentage of neurons per animal that participate in at least 40% of the trials for the early (left) and in the late (right) evoked response before (blue) and after (red) repeated stimulation. (f) Temporal structure of early (left) and late (right) evoked responses before (top row) and after (bottom row) repeated stimulation. The red dots represent the latency for each neuron. (g) Scatter plot of the latency for each neuron for the late component of the evoked response before (blue) and after (red) repeated stimulation for one animal. (h) Pair-wise comparison of the mean similarity between the early and late evoked responses before (blue) and after (red) repeated stimulation for all the animals ( $n=10$ ). The star represents statistically difference ( $p < 0.05$ , paired t-test,  $n = 10$ ).



### **Electrophysiological characterization of the evoked response**

The first thing to investigate was whether the electrophysiological evoked response at the microcircuit level is organized in a similar fashion to the observed evoked response at the mesoscale level using wide-field optical imaging. The mean evoked response over all trials at the microcircuit level is also formed by two components with similar temporal dynamics to our VSD recordings (Fig. S1 e). The time-to-half-peak of the early HL evoked responses in mice ( $M=31$  ms,  $SEM = 1.7$  ms) and rats ( $M=38.4$ ,  $SEM = 2.0$  ms) and the time-to-half-peak of the late evoked response for mice ( $M=201$  ms,  $SEM=20.51$  ms) and rats ( $M=187.0$  ms,  $SEM=13.7$  ms). On average, the early component lasted roughly 120 ms after stimulus onset and the late evoked response lasted 250 ms approximately, starting from 250 to 500 ms after stimulus onset (Fig. 4b-c). This observation was confirmed by quantifying the maximum amplitude of the mean evoked response (over trials) during the early and late phases for each neuron (Fig. S5 a). The maximum early evoked (average across trials) response was significantly larger than the late evoked response, across all neurons from all the recording animals before and after repeated stimulation (Fig. S5 b) (Rank-sum  $p<0.001$ ). In summary, these results show that the electrophysiological evoked response in anesthetized rats is organized into early and late components that have similar characteristics to the ones observed in the mesoscale VSD recordings in mice.

### **Stimulation increases the rate of neuronal participation in the early and late sensory-evoked responses**

Once we showed that neurons participate in the early and late responses in a similar fashion to the ones observed at the mesoscale level, we evaluated whether the responses at the neuronal level changed with repeated sensory stimulation. To evaluate this, the relationship between the neuronal participation during the early and late evoked responses were compared before and after repeated stimulation. The participation of a neuron in the early or late evoked response was defined as existent if its firing was above a baseline threshold (see Methods). There is a variability in the neuronal participation in the evoked responses across trials even before repeated stimulation (Fig. 4c-d). However, for the neurons that participate in at least 40% of the stimulation trials, the amount of firing increased after repeated sensory stimulation (Fig. 4 e).

Next, to find out whether the changes in firing induced by repeated stimulation occur during either the early or late components of the evoked response, the peak (maximum) firings during the early and late evoked responses were compared before and after repeated stimulation (Fig. S5 c). Our results indicate that repeated sensory stimulation significantly increases the neuronal firing of only the late evoked response (Fig. S5 d) (Wilcoxon sign-rank test,  $p<0.001$ ).

### **Stimulation alters the temporal structure of the early and late evoked responses**

To find out whether the temporal structure of the components of the sensory evoked responses are also modified by repeated stimulation, we calculated the similarity between the early and late components before and after repeated stimulation (Fig 4f). The temporal structure of the early and late evoked responses was defined using the latency of each neuron. This measure reflects the order in which each neuron tends to fire with respect to the rest of the population (see Methods <sup>20</sup>). The similarity between the temporal structure during the early and late evoked responses was defined as the correlation coefficient of the latencies for all neurons (Fig. 4g).

Similarly to the spatiotemporal patterns in our wide-field imaging recordings, the similarity between the temporal structure of the early and late evoked responses increases significantly (paired t-test,  $p < 0.05$ ,  $n=10$ ) after repeated sensory stimulation (Fig. 4h). Similar results were found when the temporal structure was defined as the time of the mean peak-firing for spike trains of each neuron across trials (Figs S5 f-g). In addition, when the changes induced by repeated stimulation of temporal structure of the early and late evoked responses, the temporal structure of the late evoked response showed more changes (became less similar) than the early evoked response (Fig. S5 h-i).

In summary, these results show that the similarity of the temporal structure of the early and late components of the evoked response increases after repeated hind paw stimulation. In addition, most of the changes of the temporal structure after repeated stimulation occurs during the late evoked response. Altogether, our results show that the evoked response is formed by an early and a late component at the mesoscale and microcircuit levels. After repeated sensory stimulation, the late component changes its spatiotemporal structure to closely resemble the pattern of activity during the early evoked response. These selective changes occur in different sensory modalities, at different spatial scales, and in different rodent species.

### **Discussion**

The sensory evoked response is formed by two components. The first component consists of the initial evoked response that lasts around 100 ms after stimulus onset (early evoked response). The second component consists of an additional ‘bump’ of activity that starts around 180 ms after stimulus onset and lasts for about 210 ms (late evoked response). A similar description of the evoked response in several sensory areas has been reported <sup>2-4,35</sup>. In these studies, it is argued that the second component of the evoked response is associated with sensory perception.

In this work we demonstrate how repeated stimulation alters the dynamics of the evoked responses to sensory stimulation at the mesoscale and microcircuit levels. At the mesoscale level we found that after

repeated stimulation, the amplitude of the late evoked response increases after repeated sensory stimulation and the spatiotemporal pattern of the late evoked response becomes more similar to the pattern of the early evoked response. These experience dependent modifications of spatiotemporal brain activity occur in the sensory modality that was stimulated (i.e. somatosensory and auditory cortices) and can be induced in more than one modality in the same preparation and, in both, anesthetized and awake animals. Analogously, at the microcircuit level, the firing of the most reliable neurons increases after repeated sensory stimulation during the late component of the evoked response. Moreover, the temporal structure of the evoked pattern of activity during the late component becomes more similar to the pattern of activity of the early evoked response after repeated sensory stimulation. In summary, we show that, at the microcircuit and mesoscale levels, most of the changes induced by the repeated stimulation occur during the late component of the evoked responses and these changes make the patterns of activity of the late component more similar to the pattern of activity of the early evoked response.

### **The bimodal organization of the sensory evoked response**

According to the literature, the two components of the sensory evoked response are related to different functions and are produced by different brain circuits. On the one hand, the early component is associated with sensory identity and is produced by the feedforward thalamocortical inputs to the corresponding sensory areas<sup>3</sup>. On the other hand, the second component is associated with sensory perception and it is produced by a combination of feedback cortico-cortical and thalamocortical inputs<sup>3,4,36</sup>. At least for the cortical feedback, it has been suggested that the late evoked responses in primary sensory areas is originated by a neuronal population in higher cortical areas and that this signal is associated to perceptual processing<sup>5,37,38</sup>.

Apart from the perceptual content of the biphasic organization of cortical evoked responses, there are other ideas regarding the function of the biphasic organization of cortical activity. Recently, a biphasic organization of cortical activity has been proposed as an information organization in which brain activity is transmitted in packets. The early component is proposed to contain categorical (more general) information and be less variable. The late component is proposed to contain more specific information (identity)<sup>39</sup>. Even though more experiments are needed to clarify the information content of the early and late components of evoked responses, there are similarities in their organization described in this paper and the one in the packet-based theory of information transmission in the brain, which are important to highlight. One is that the two-part configuration of the packet-based theory, in which the first part shows less variability and a second part which carries a more complex information and seems to be more plastic after experience. The second part corresponds to the late component in our study, which resembles the spatiotemporal pattern of the early evoked response. In our experiments we observed that after repeated

stimulation, there is an enhancement of the evoked response organization into two components (Fig S1 c, f). This modification lasts up to two hours after repeated stimulation (Fig. S1 d). In addition, the slope of the early and late components of the evoked response after repeated sensory stimulation (Fig. S1 g). This result suggests that the repeated stimulation increases synaptic strengths in the brain circuitry involved in the early and late evoked responses. However, additional experiments are needed (e.g. NMDA blocking) to test this hypothesis.

### **Organization of the evoked responses in different sensory modalities**

When we compared the cortical evoked responses to different sensory stimulation, we found that the temporal organization of the evoked responses, although similar, are not exactly the same across sensory modalities<sup>24</sup>. In particular, as shown previously<sup>24</sup>, the stimulation of the forepaw and hind paw causes a rapid early evoked response in the corresponding areas of the somatosensory cortex that is comparable to the response in auditory cortex (around 20 ms after stimulus onset) but significantly faster than the response in the visual cortex (around 50 ms after stimulus onset) (Fig. S3 a). Remarkably, there is no difference in the temporal structure of the late component of the evoked response for different sensory modalities (Fig. S3 b).

### **Experience dependent changes in the sensory evoked response and their functional role**

Why would the late evoked response increase after repeated stimulation? According to recent research, animals that are better learners in sensory discrimination tasks (visual or tactile) also show an increase in the late evoked response compared to animals that do not learn the task<sup>2-4</sup>. In our study, we observe this increase in the membrane depolarization (measured with voltage imaging) and synaptic activity (measured with glutamate imaging) signal at the mesoscopic level (Fig. 2c and 4d) but also as an increase in LFP and multi-unit firing activity (Fig. 4b). This suggests an increase in the recruited neuronal population given by an increase in the connectivity between the population that generates the late evoked response and the neurons in the primary sensory area from which we are recording. The increase in computations carried out during the late evoked response might translate into a better information integration of the sensory inputs which, in turn, might result in the stimulus being better perceived. The increase in participation or amplitude of evoked responses seems to vary across neurons. It has been previously reported that there are different populations of neurons in the primary somatosensory cortex which have different target areas. The neurons that project to motor areas participate less in the late evoked response than neurons that project to secondary somatosensory areas<sup>5,37</sup>.

This leads to the next question of why the late evoked response not only increases in amplitude but also in similarity to the early evoked response. A possible explanation for the increase in similarity between the late and early evoked responses after repeated presentation of similar stimulus could be provided from

the neurophysiology of reinforcement learning theory<sup>40</sup>. In this view, during learning, a feedback signal is necessary to perform the synaptic updates (strengthened or weakened) of the circuits according to rewards or punishment associated with a selected action triggered by the received stimulus. The late component of the evoked response, arguably a signal generated in higher cortical areas, could serve this purpose (Fig. 5). That is, top-down modulation might be the mechanism to induce perceptual learning<sup>41</sup>. This perceptual learning might be implemented as modifications in the synaptic connections of the primary sensory circuitry.

From this perspective, during cortical activated states (both during awake or in an anesthetized preparation with amphetamine), in which the cortical plasticity is increased, the repeated presentation of the same stimulus sculpts the circuitry such that the corresponding pattern of activity becomes an attractor and, subsequent inputs to the circuit such as the late evoked response, falls into this deepened basin of attraction and the early evoked response is replayed. However, further experiments to test these ideas are necessary.

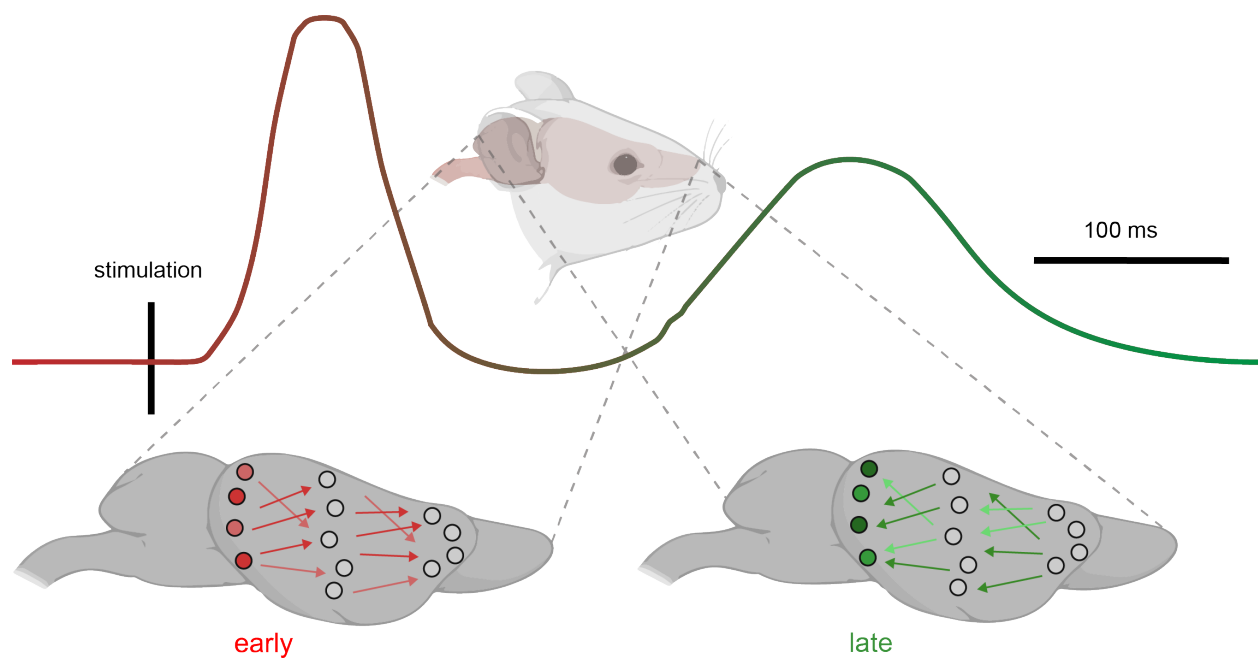

**Fig. 5. Origin and role of the early and late components of the sensory evoked response.** Schematic description of the origin of the early and late evoked components. The early component is originated by feedforward thalamocortical inputs to the sensory cortex (e.g. V1) and carries primary information about the stimulus (red). The late component is a feedback signal either from higher cortical areas or thalamus and is associated with the stimulus perception (green). After the initial cortical response (from the thalamus) reaches higher cortical areas (left) and the corresponding computations (i.e. motor selection and attentional tagging) occur, a feedback signal is produced that goes back to sensory areas (from higher cortical or subcortical regions). Finally, due to neuromodulatory processes (reward or punishment), the relevant synapses are modified accordingly.

## **Limitations and Future work**

Different avenues are left unexplored in this work such as the relationship between cortical state and the organization of the evoked response. According to Curto et al., (2009), a similar structure of the evoked response can be largely explained by the cortical state preceding the stimulus presentation. However, in our recordings, this was not the case. In our experiments, the brain state did not show a relationship with changes in the amplitude nor similarity between the early and late evoked components. However, we confirmed that the brain state was more desynchronized after amphetamine injection, and that changes in the brain state remain stable for at least one hour (Fig. S2). At the behavioral level, it has been shown that the cortical state preceding the stimulus presentation did not affect the performance in a simple sensory perception task in head-restrained mice <sup>4</sup>. A deeper understanding at the single trial level in a preparation in which the cortical state could be quantified and separated from behavior, such as the one presented here, could shed some light on this issue. On a similar note, with the approach presented here, it should be possible to study the relationship between the changes observed during the late evoked response and other cortical regions. For example, an analysis of the cortical activity propagation could reveal whether a cortico-cortical propagation of activity (travelling waves) could explain the increase in similarity between the early and late components at the single-trial level.

Finally, even though we show that repeated stimulation given to awake animals increases the similarity between the spatiotemporal patterns of activity during the early and late components of the evoked response in auditory cortex (Fig. 1g and Fig. S3), we believe that the perceptual content of this signal might be limited. We know that perception might be affected by cognitive processes such as attention and motivation. Since the animals in our experiments were passively listening to tones, we believe that changes in the late evoked responses might be enhanced when the sensory stimulation has ‘meaning’ for the animal. Future experiments to test this would need to include a sensory-discrimination task in which sensory perception is directly associated to task performance.

## **Significance**

Together, the results presented in this work demonstrate that the late evoked response that is usually associated with perception in sensory cortices can be modified with experience (repeated sensory stimulation) at the meso and microcircuit levels. To the best of our knowledge this study is the first one to demonstrate the spatiotemporal changes at different scales of the late sensory evoked response induced by repeated stimulation occurs in different sensory modalities and in different species. This work expands the understanding of the content of the late evoked response and its relationship with experience. This cortical phenomenon might be important to understand perception.

**Acknowledgments:**

The present review was supported by Canadian Institutes of Health Research (CIHR) Grant# 390930 (MHM) and #199179 (AL), Natural Sciences and Engineering Research Council of Canada (NSERC) Discovery Grant #40352 (MHM) and #04636 (AL), Alberta Innovates (CAIP Chair) Grant #43568, Alberta Alzheimer Research Program Grant # PAZ15010 and PAZ17010, and Alzheimer Society of Canada Grant# 43674 to MHM. We thank Jianjun Sun for assistance with surgeries, Behroo Mirza Agha and Di Shao for animal husbandry. We thank Rasa Gulbinaite for feedback on this manuscript.

**Author contribution:** E.B.C., A.L. and M.H.M. designed the experiments. E.B.C., and A.G.S conducted the experiments. E.B.C. performed data analysis. E.B.C and M.H.M. wrote the manuscript, which all authors commented on and edited. M.H.M. and A.L. supervised the project.

## References

1. Panzeri, S., Harvey, C. D., Piasini, E., Latham, P. E. & Fellin, T. Cracking the Neural Code for Sensory Perception by Combining Statistics, Intervention, and Behavior. *Neuron* **93**, 491–507 (2017).
2. Funayama, K. *et al.* Neocortical Rebound Depolarization Enhances Visual Perception. *PLoS Biol.* 1–25 (2015). doi:10.1371/journal.pbio.1002231
3. Manita, S. *et al.* A Top-Down Cortical Circuit for Accurate Sensory Perception. *Neuron* **86**, 1304–1316 (2015).
4. Sachidhanandam, S., Sreenivasan, V., Kyriakatos, A., Kremer, Y. & Petersen, C. C. H. Membrane potential correlates of sensory perception in mouse barrel cortex. *Nat. Neurosci.* **16**, 1671–1677 (2013).
5. Yamashita, T. & Petersen, C. C. H. Target-specific membrane potential dynamics of neocortical projection neurons during goal-directed behavior. *Elife* **5**, 1–11 (2016).
6. Hedges, D. *et al.* P300 Amplitude in Alzheimer’s Disease. *Clin. EEG Neurosci.* **47**, 48–55 (2016).
7. Dinteren, R., Arns, M., Jongma, M. L. A. & Kessels, R. P. C. P300 development across the lifespan: A systematic review and meta-analysis. *PLoS One* (2014). doi:10.1371/journal.pone.0087347
8. Sutton, S., Braren, M., Zubin, J. & John, E. R. Evoked-Potential correlates of stimulus uncertainty. *Science (80- )*. **150**, 1187–1188 (1965).
9. Patel, S. H. & Azzam, P. N. Characterization of N200 and P300: Selected studies of the Event-Related Potential. *Int. J. Med. Sci.* **2**, 147–154 (2005).
10. Baykara, E. *et al.* Effects of training and motivation on auditory P300 brain-computer interface performance. *Clin. Neurophysiol.* **127**, 379–387 (2016).
11. Twomey, D. M., Murphy, P. R., Kelly, S. P. & O’Connell, R. G. The classic P300 encodes a build-to-threshold decision variable. *Eur. J. Neurosci.* **42**, 1636–1643 (2015).
12. Arrubla, J., Neuner, I., Hahn, D., Boers, F. & Shah, N. J. Recording Visual Evoked Potentials and Auditory Evoked P300 at 9.4T Static Magnetic Field. *PLoS One* **8**, 1–7 (2013).
13. Otzenberger, H., Gounot, D. & Foucher, J. R. P300 recordings during event-related fMRI: A feasibility study. *Cogn. Brain Res.* **23**, 306–315 (2005).



14. Cooke, S. F. & Bear, M. F. Visual experience induces long-term potentiation in the primary visual cortex. *J Neurosci* **30**, 16304–16313 (2010).
15. Takeuchi, T., Duzskiewicz, A. J. & Morris, R. G. M. The synaptic plasticity and memory hypothesis: encoding, storage and persistence. *Philos. Trans. R. Soc. Lond. B. Biol. Sci.* **369**, 20130288 (2014).
16. Bear, M. F. & Malenka, R. C. Synaptic plasticity: LTP and LTD. *Curr. Opin. Neurobiol.* **4**, 389–399 (1994).
17. Malenka, R. C. & Bear, M. F. LTP and LTD: an embarrassment of riches. *Neuron* **44**, 5–21 (2004).
18. Skaggs, W. E. & McNaughton, B. L. Replay of neuronal firing sequences in rat hippocampus during sleep following spatial experience. *Science* **271**, 1870–1873 (1996).
19. Ji, D. & Wilson, M. A. Coordinated memory replay in the visual cortex and hippocampus during sleep. *Nat. Neurosci.* **10**, 100–7 (2007).
20. Bermudez Contreras, E. J. *et al.* Formation and Reverberation of Sequential Neural Activity Patterns Evoked by Sensory Stimulation Are Enhanced during Cortical Desynchronization. *Neuron* **79**, 555–566 (2013).
21. Han, F., Caporale, N. & Dan, Y. Reverberation of recent visual experience in spontaneous cortical waves. *Neuron* **60**, 321–7 (2008).
22. Ferezou, I. *et al.* Spatiotemporal Dynamics of Cortical Sensorimotor Integration in Behaving Mice. *Neuron* **56**, 907–923 (2007).
23. Luczak, A., McNaughton, B. L. & Harris, K. D. Packet-based communication in the cortex. *Nat. Rev. Neurosci.* **16**, 745–755 (2015).
24. Mohajerani, M. H. *et al.* Spontaneous cortical activity alternates between motifs defined by regional axonal projections. *Nat. Neurosci.* 1–13 (2013). doi:10.1038/nn.3499
25. Marvin, J. S. *et al.* An optimized fluorescent probe for visualizing glutamate neurotransmission. *Nat. Methods* **10**, 162–170 (2013).
26. Xie, Y. *et al.* Resolution of High-Frequency Mesoscale Intracortical Maps Using the Genetically Encoded Glutamate Sensor iGluSnFR. *J. Neurosci.* **36**, 1261–1272 (2016).
27. Huang, Z. J. & Zeng, H. Genetic approaches to neural circuits in the mouse. *Annu. Rev. Neurosci.*

- 36**, 183–215 (2013).
28. Madisen, L. *et al.* Transgenic Mice for Intersectional Targeting of Neural Sensors and Effectors with High Specificity and Performance. *Neuron* **85**, 942–958 (2015).
  29. Mohajerani, M. H., McVea, D. a, Fingas, M. & Murphy, T. H. Mirrored bilateral slow-wave cortical activity within local circuits revealed by fast bihemispheric voltage-sensitive dye imaging in anesthetized and awake mice. *J. Neurosci.* **30**, 3745–51 (2010).
  30. Kyweriga, M., Sun, J., Wang, S., Kline, R. & Mohajerani, M. H. A Large Lateral Craniotomy Procedure for Mesoscale Wide-field Optical Imaging of Brain Activity. *J. Vis. Exp.* 1–7 (2017). doi:10.3791/52642
  31. Bermudez-Contreras, E. *et al.* High-performance, inexpensive setup for simultaneous multisite recording of electrophysiological signals and mesoscale voltage imaging in the mouse cortex. *Neurophotonics* **5**, 1 (2018).
  32. Gomez Palacio Schjetnan, A. & Luczak, A. Recording large-scale neuronal ensembles with silicon probes in the anesthetized rat. *J. Vis. Exp.* 1–5 (2011). doi:10.3791/3282
  33. Kadir, S. N., Steinmetz, N. A., Goodman, D. F. M., Zugaro, M. & Harris, K. D. Klustakwik Spike Sorting. (2012).
  34. Redish, A. D. MClust. Spike Sorting Toolbox. (2017).
  35. Crochet, S. & Petersen, C. C. H. Cortical Sensorimotor Reverberations. *Neuron* **86**, 1116–1118 (2015).
  36. Guillery, R. W. & Sherman, S. M. Thalamic Relay Functions and Their Role in Corticocortical Communication: Generalizations from the Visual System. *Neuron* **33**, 163–175 (2002).
  37. Kwon, S. E., Yang, H., Minamisawa, G. & O'Connor, D. H. Sensory and decision-related activity propagate in a cortical feedback loop during touch perception. *Nat. Neurosci.* **19**, 1243–1249 (2016).
  38. Romo, R. & Rossi-Pool, R. Turning Touch into Perception. *Neuron* **105**, 16–33 (2020).
  39. Luczak, A., McNaughton, B. L. & Harris, K. D. Packet based communication in the cortex. *Nat. Rev. Neurosci.* **16**, 1–12 (2015).
  40. Roelfsema, P. R. & Holtmaat, A. Control of synaptic plasticity in deep cortical networks. *Nat. Rev. Neurosci.* **19**, (2018).

41. Caras, M. L. & Sanes, D. H. Top-down modulation of sensory cortex gates perceptual learning. *Proc. Natl. Acad. Sci.* **114**, 9972–9977 (2017).

## Supplementary material

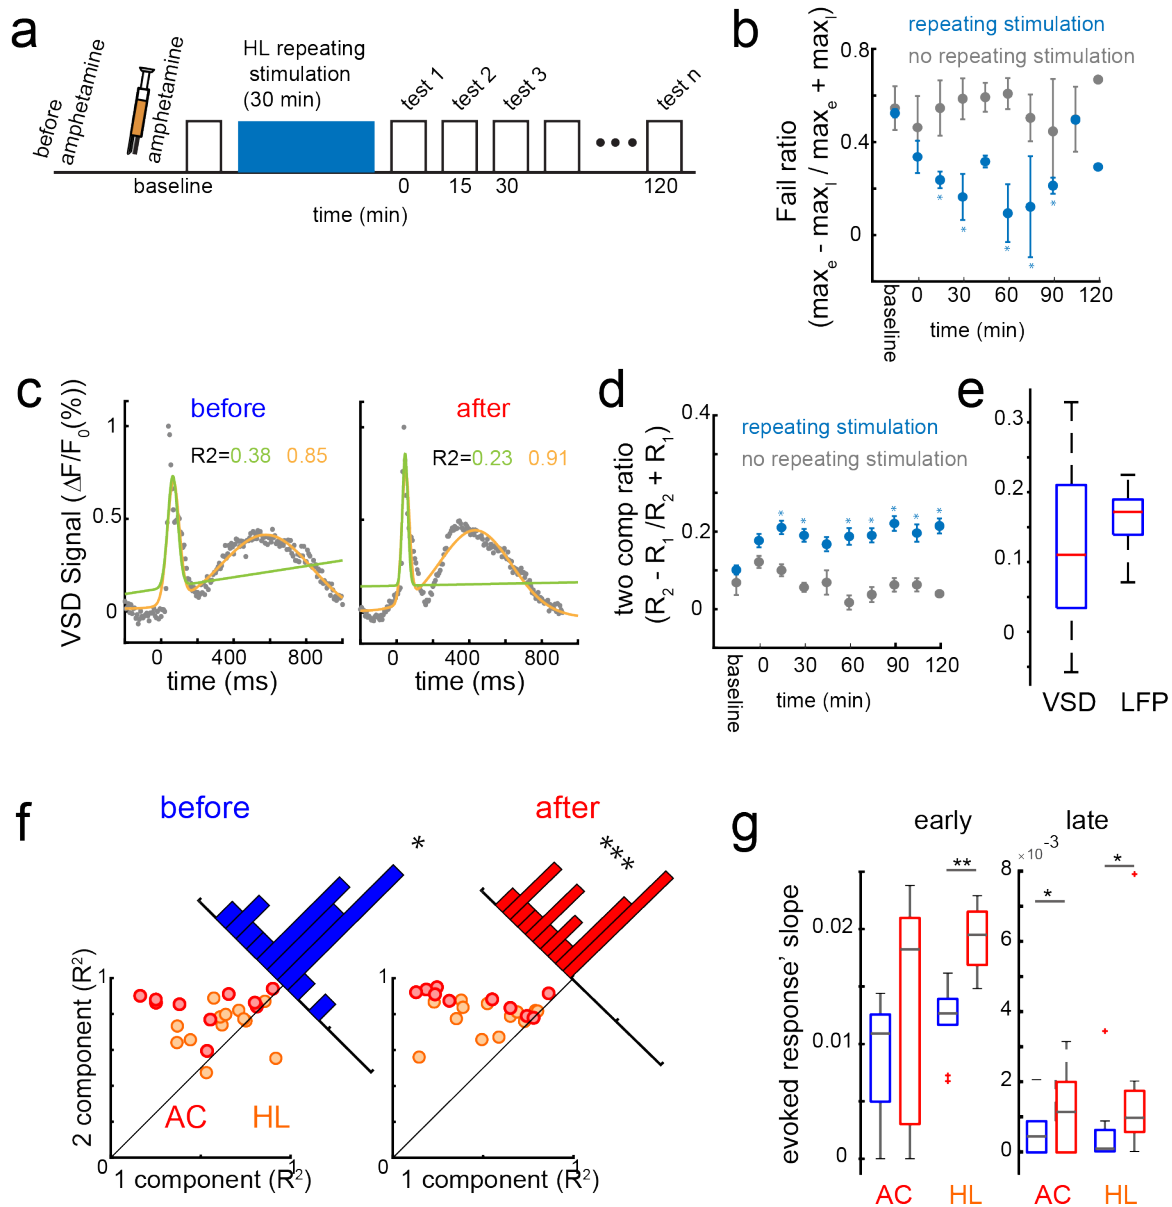

**Fig. S1. Dynamics and organization of the evoked responses.** (a) Experiment protocol. 30 trial evoked responses were collected after injecting amphetamine (baseline), repeated electrical pulses per second were given to the hind paw during 30 min. Subsequent tests of 30 trials each were collected every 15 min after repeated stimulation. (b) Dynamics of the Fail ratio between the early and late component for animals that received repeated stimulation (blue) and animals that did not receive repeated stimulation (grey). (c) Example of approximation of single-trial evoked responses using a Gaussian Mixture Model with one (green) or two (yellow) components before (left) and after (red) repeated stimulation. (d) Dynamics of the two-component ratio. Error bars denote the S.E.M. and stars denote trials that are significantly different to the baseline trials (ANOVA with Bonferroni correction,  $n = 90$  trials). (e) Boxplot of the two component ratio for the HL evoked responses recorded with VSD and LFP. (f) Scatter plots of R-squared using one or two components before (blue) and after (red) repeated stimulation. Each dot denotes the mean R-squared for the corresponding model (1 or 2 components) across trials of each animal for hind paw (orange) or auditory (red)

stimulation. The stars represent  $p < 0.05$  and  $p < 0.001$ , t-test). (g) Comparison of the slopes of the early (left) and late (late) evoked components for the evoked responses to auditory stimulation (AC) and hind paw stimulation (HL) before (blue) and after (red) repeated stimulation. Stars denote significant differences between the populations ( $p < 0.05$ ,  $p < 0.01$ , Wilcoxon rank sum test or t-test depending whether the distributions were normal or not).

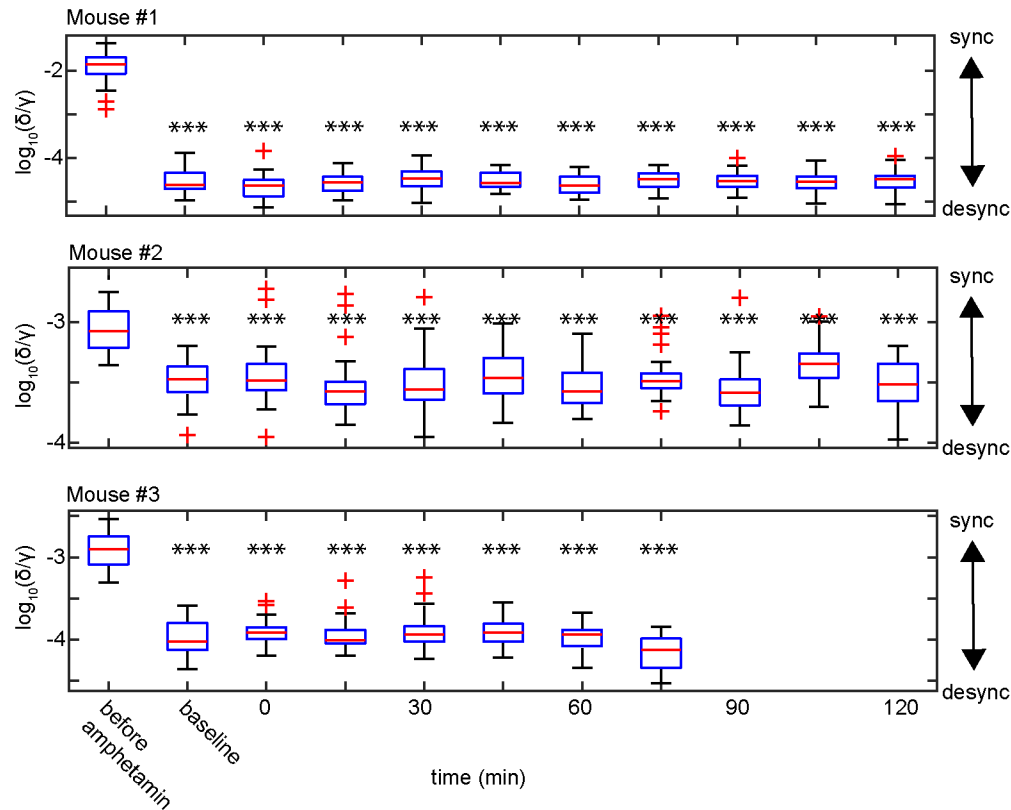

**Fig. S2. Cortical state stability.** Each panel shows the brain state for separate animals across the corresponding recordings. The brain state before amphetamine was injected was significantly different from every recording for up to two hours (one-way ANOVA, Bonferroni correction, \*\*\* represents  $p < 0.001$ ). In contrast, the brain state was not significantly different across recordings after amphetamine injection.

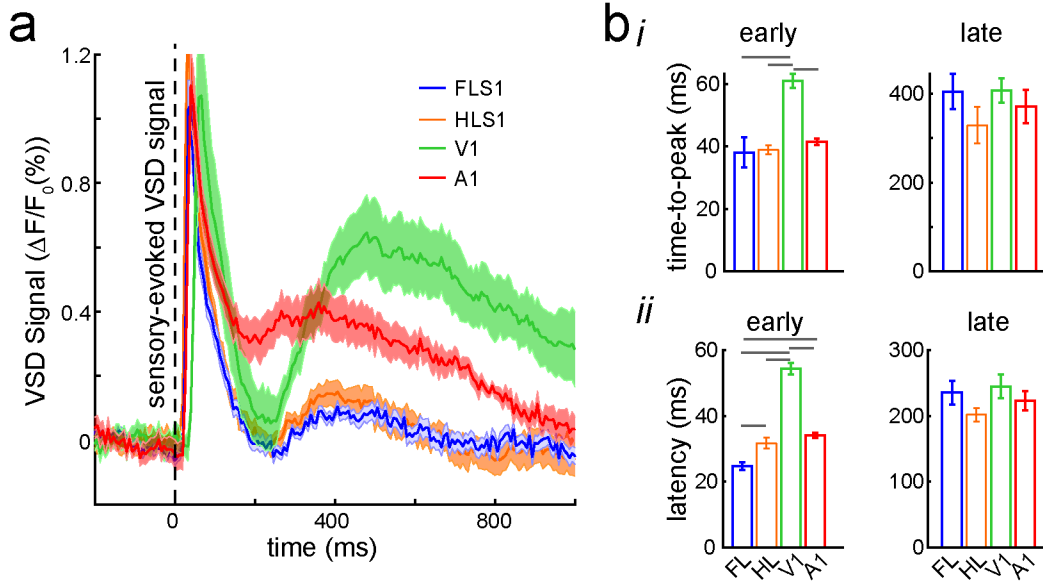

**Fig. S3. Organization of the evoked response for multiple sensory modalities and its changes induced by repeated sensory stimulation.** (a) Average evoked responses for stimulation of the fore paw (FL), hind paw (HL), visual stimulation (VC) and auditory stimulation (AC) before repeated stimulation. Solid lines represent the mean ( $n=7, 12, 7, 12$  for each sensory modality respectively). The shadows represent the SEM across animals. (b) Temporal organization of the evoked response for different sensory modalities. (i) mean time-to-peak across animals for the early (left) and late (right) components of the evoked response. (ii) mean latency of the evoked response for the early (left) and late (right) components of the evoked responses. The error bars denote the SEM. The gray horizontal lines denote significant differences across the populations for the different stimulated peripheries ( $p < 0.05$ , one-way ANOVA).

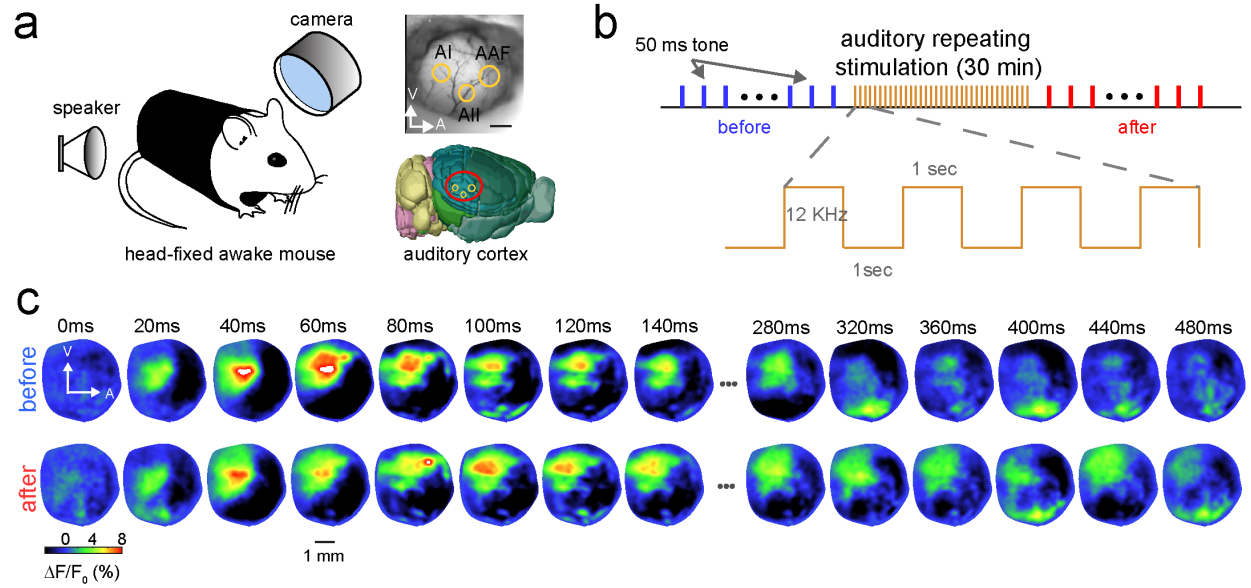

**Fig. S4. Experience dependent changes in spatiotemporal patterns of evoked activity in awake animals. (a)** Experimental setup. Animals are head-fixed passively listening to tones while brain activity is recorded in the auditory cortex. **(b)** Experimental protocol. Single 50 ms tone trials were recorded before (blue) and after (red) repeated auditory stimulation during 30 min. **(c)** Spatiotemporal pattern of evoked activity before (top row) and after (bottom row) repeated auditory stimulation.

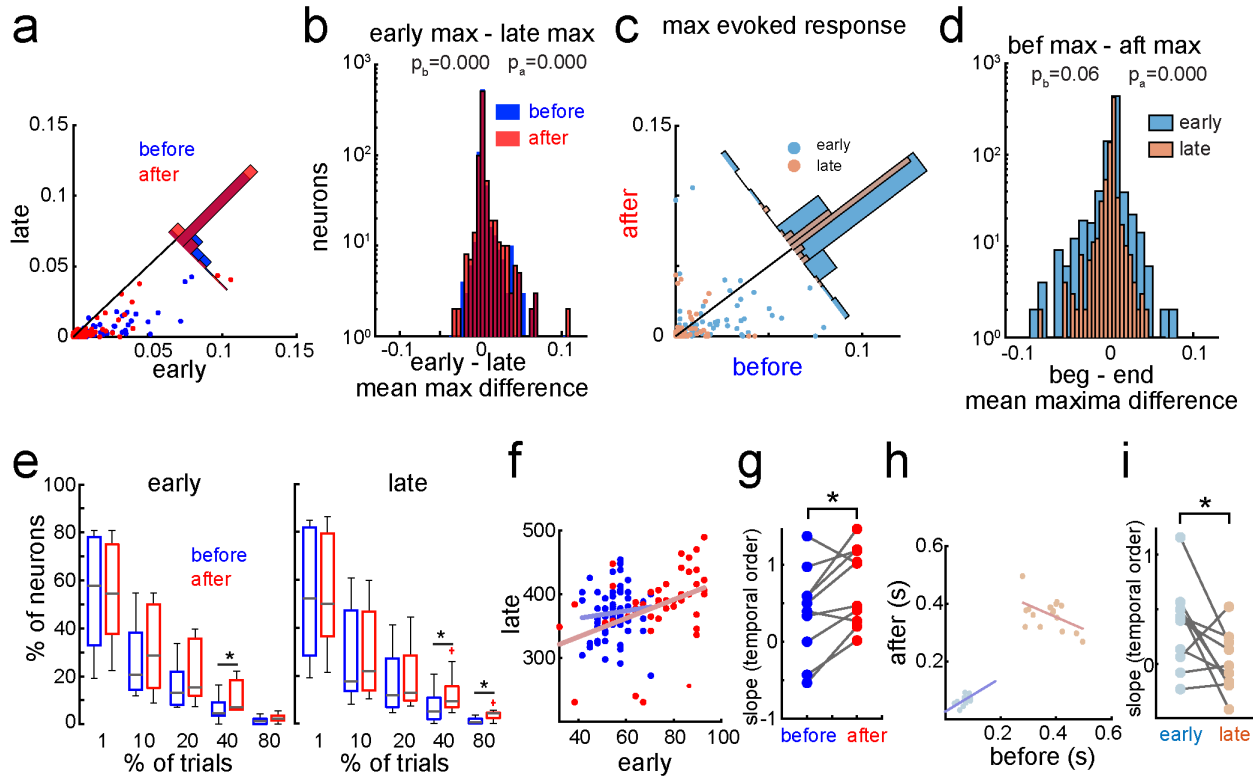

**Fig. S5. Characterization of the early and late components of the evoked responses at the microcircuit level.** (a) Scatter plot of the maximum early and late evoked responses for all neurons recorded in a rat before and after repeated stimulation. (b) Histogram of the maxima early and late evoked responses at the beginning and end of the repeated stimulation for all the neurons for all the animals ( $n=768$ ). (c) Scatter plot of the maximum mean early (light blue) and late (light orange) evoked responses at the beginning and end of the repeated stimulation one animal. Inset: histogram of the difference between the maximum response at the beginning and end of repeated stimulation for the early (blue) and late (orange) evoked responses. (d) Histogram of the difference between the maximum evoked responses during the early (light blue) and late (pink) responses at the beginning and end of the repeated stimulation for all the neurons of all the animals recorded ( $n=10$ ). (e) Boxplot of the average percentage of neurons per animal that participate in the early (left) and in the late (right) evoked response before (blue) and after (red) repeated stimulation as a function of the % of the total number of trials. (f) Scatter plot of the peak-response times for each neuron for the early and late components of the evoked response before (blue) and after (red) repeated stimulation. (g) Paired comparison between the slope of the linear fit for the early and late components for all the animals before and after repeated stimulation. (h) Scatter plot of the peak-response times for each neuron before and after repeated stimulation for the early (blue) and late (orange) components of the evoked response. (i) Paired comparison between the slope of the linear fit for the early and late components for all the animals. Star denotes significant differences in the paired comparison (paired t-test,  $p < 0.05$ ,  $n = 10$ ).
